# Supplementary material
Source: publisher site journal article supplement (https://www.spandidos-publications.com/2941/downloadSupplementary)

Figure S1. Modulation of Vav1 expression in cell lines from triple-negative patient-derived xenografts. Representative western blot analysis of Vav1 in PDX-derived cell lines, in which Vav1 was (A) overexpressed (Over Vav1) or (B) silenced with specific siRNAs (Vav1 siRNAs). PDX, patient-derived xenograft.

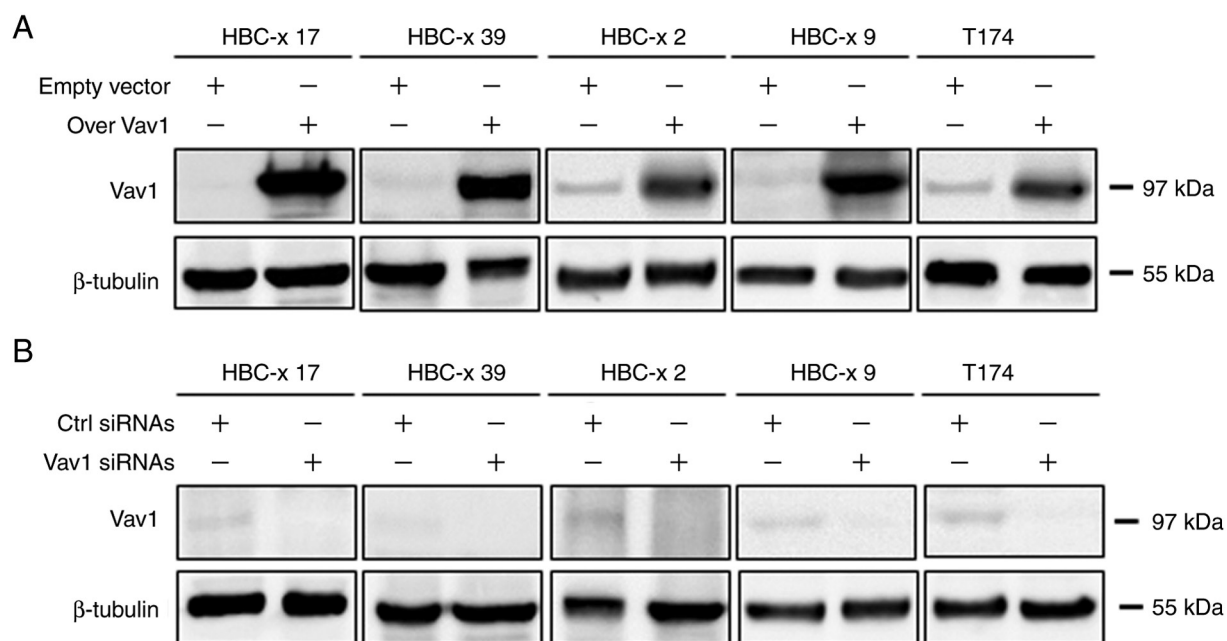

Supplement: Supplementary file 1 [file downloadSupplementary]
